# Supplementary material for: Apomictic Mountain Whitebeam (Sorbus austriaca, Rosaceae) Comprises Several Genetically and Morphologically Divergent Lineages
Source: MDPI journal article supplement (doi:10.3390/biology12030380), 2023-02-27
Supplement: s1 [file s1]

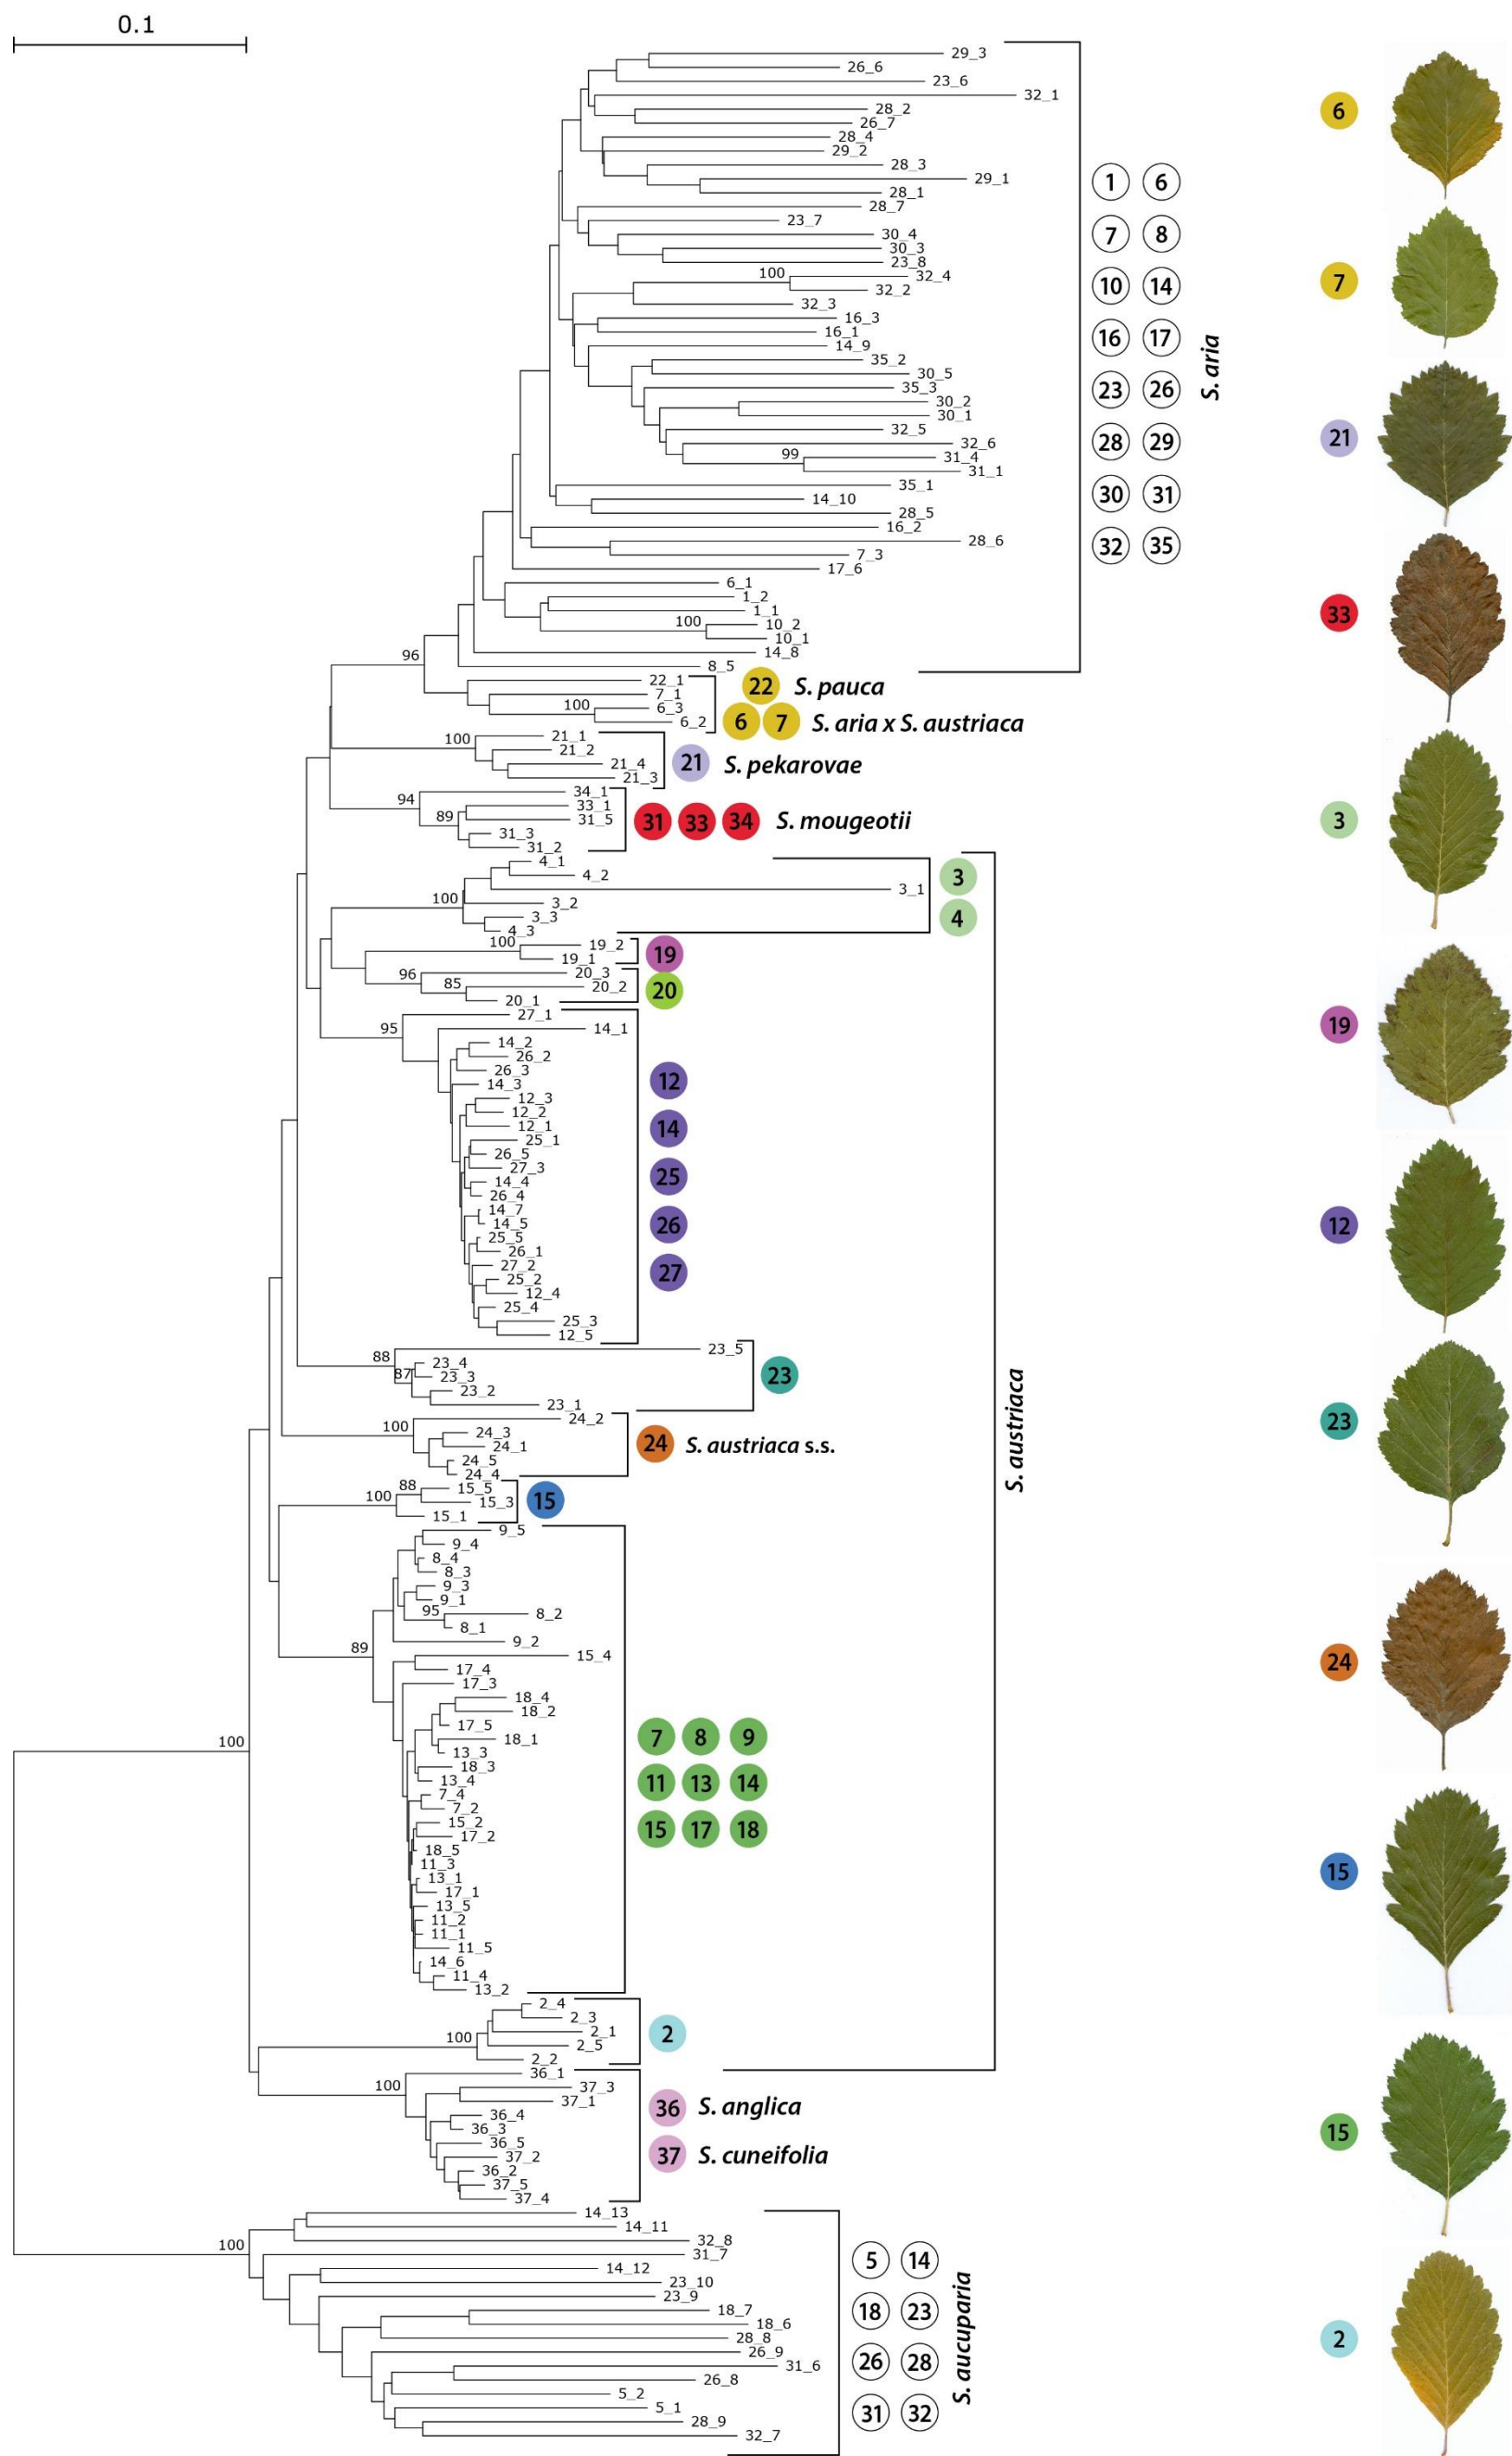

**Figure S1.** Neighbor-Joining analysis of AFLP data for *Sorbus* subgen. *Soraria*, *S.* subgen. *Aria* and *S.* subgen. *Sorbus*. Localities' numbers and groups' colours follow the other Tables and Figures.

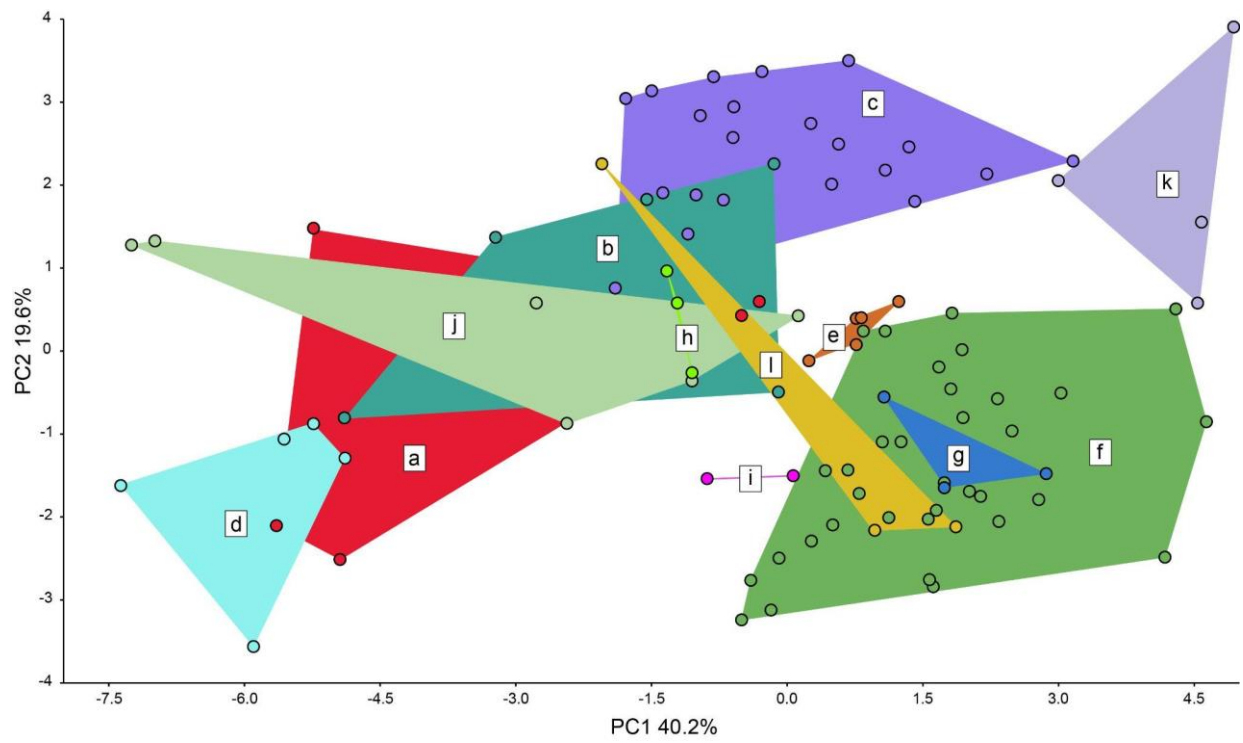

**Figure S2.** PCA ordination of 18 morphological traits for all *Soraria* accessions. Colours and letters correspond to AFLP clusters in Figure 1.

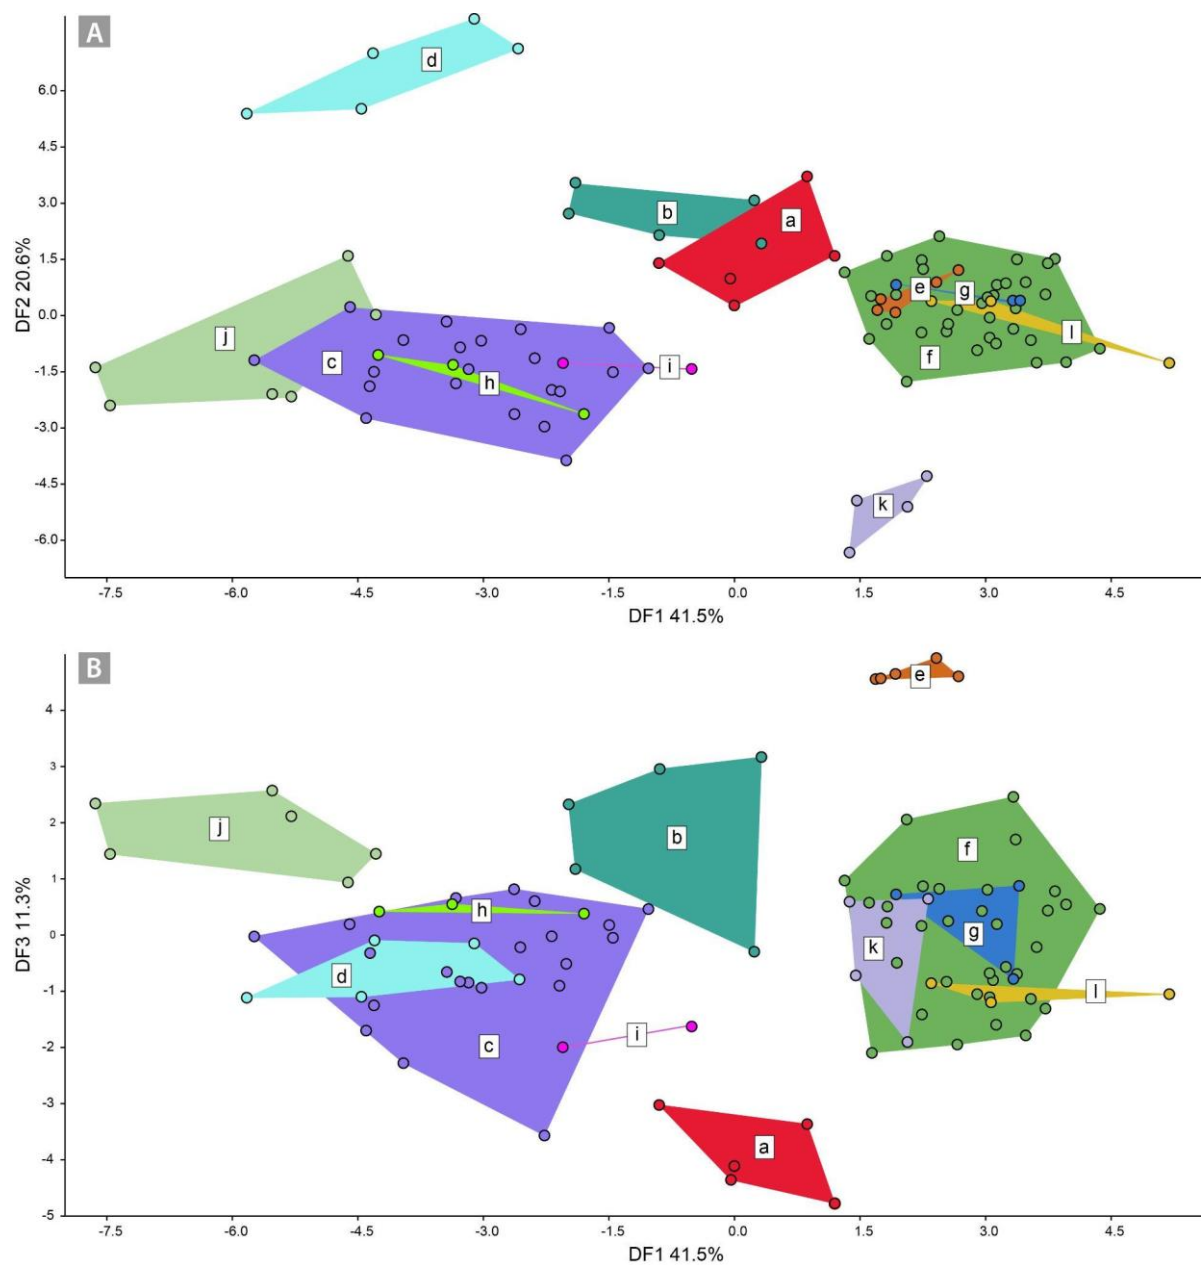

**Figure S3.** Canonical discriminant analysis (**A:** DF1 vs. DF2; **B:** DF1 vs. DF3) of 12 predefined groups (corresponding to AFLP clusters) based on individual plants and 18 morphological characters. Colours and letters correspond to AFLP clusters in Figure 1.

**Table S1.** Geographic origin and number of individuals of *Sorbus* populations included in the analyses of AFLP, nuclear microsatellite, plastid DNA sequencing, flow cytometric and morphometric data, respectively.

| No. | ID  | LOCALITY                                                                                                                                                                                                                                                                                                                        | <i>Sorbus aucuparia</i> | <i>Sorbus aria</i> | Subgen. <i>Soraria</i>                   |                         |                         |                     |                         |                       |                          | TOTAL per locality |
|-----|-----|---------------------------------------------------------------------------------------------------------------------------------------------------------------------------------------------------------------------------------------------------------------------------------------------------------------------------------|-------------------------|--------------------|------------------------------------------|-------------------------|-------------------------|---------------------|-------------------------|-----------------------|--------------------------|--------------------|
|     |     |                                                                                                                                                                                                                                                                                                                                 |                         |                    | <i>Sorbus aria</i> × <i>S. austriaca</i> | <i>Sorbus austriaca</i> | <i>Sorbus mougeotii</i> | <i>Sorbus pauca</i> | <i>Sorbus pekarovae</i> | <i>Sorbus anglica</i> | <i>Sorbus cuneifolia</i> |                    |
| 1   | Shi | Shija Gorge, Bicaĵ, Kukes, Albania, 41° 05' 03" N, 20° 25' 56" E, 900 m; Leg. B. Frajman, P. Schönschwetter & M. Falch (SARA 60022)                                                                                                                                                                                             | –, –, –, –              | 2, 2, –, –         | –, –, –, –                               | –, –, –, –              | –, –, –, –              | –, –, –, –          | –, –, –, –              | –, –, –, –            | –, –, –, –               | 2, 2, –, –         |
| 2   | Suv | Suva planina, Serbia, 43° 09' 24" N, 22° 13' 17" E, 1566 m; Leg. M. Niketić (SARA 60027, GenBank OQ511841, OQ511875)                                                                                                                                                                                                            | –, –, –, –              | –, –, –, –         | –, –, –, –                               | 5, 5, 1, 3, 5           | –, –, –, –              | –, –, –, –          | –, –, –, –              | –, –, –, –            | –, –, –, –               | 5, 5, 1, 3, 5      |
| 3   | Bai | Băile Herculane, Romania, 44° 52' 45" N, 22° 25' 58" E, 936 m; Leg. Cs. Németh (Herbarium Cs. Németh 934/3, GenBank OQ511840, OQ511874)                                                                                                                                                                                         | –, –, –, –              | –, –, –, –         | –, –, –, –                               | 3, 3, 1, –, 3           | –, –, –, –              | –, –, –, –          | –, –, –, –              | –, –, –, –            | –, –, –, –               | 3, 3, 1, –, 3      |
| 4   | Cic | Ciclova Montană, Romania, 45° 03' 02" N, 21° 46' 05" E, 821 m; Leg. Cs. Németh (Herbarium Cs. Németh 909/2, GenBank OQ511844, OQ511878)                                                                                                                                                                                         | –, –, –, –              | –, –, –, –         | –, –, –, –                               | 3, 3, 1, –, 3           | –, –, –, –              | –, –, –, –          | –, –, –, –              | –, –, –, –            | –, –, –, –               | 3, 3, 1, –, 3      |
| 5   | Kop | Kopaonik, Serbia, 43° 17' 22" N, 20° 47' 36" E, 1630 m; Leg. A. Hajrudinović-Bogunić & F. Bogunić (SARA 60028)                                                                                                                                                                                                                  | 2, 2, –, 2, –           | –, –, –, –         | –, –, –, –                               | –, –, –, –              | –, –, –, –              | –, –, –, –          | –, –, –, –              | –, –, –, –            | –, –, –, –               | 2, 2, –, 2, –      |
| 6   | Moj | Mojstirska Draga, Serbia, 42° 52' 26" N, 20° 24' 13" E, 1500 m; Leg. A. Hajrudinović-Bogunić & F. Bogunić (SARA 60029; SARA 60030, GenBank OQ511821, OQ511855)                                                                                                                                                                  | –, –, –, –              | 1, 1, –, 1, –      | 2, 2, 1, 1, 2                            | –, –, –, –              | –, –, –, –              | –, –, –, –          | –, –, –, –              | –, –, –, –            | –, –, –, –               | 3, 3, 1, 2, 2      |
| 7   | Rug | Rugovska klisura, Kosovo, 42° 39' 41" N, 20° 14' 36" E, 580 m; Leg. B. Frajman, P. Schönschwetter & M. Falch (SARA 60024; SARA 60025; SARA 60026, GenBank OQ511848, OQ511882)                                                                                                                                                   | –, –, –, –              | 1, 1, –, –         | 1, 1, –, 1                               | 2, 2, 1, –, 2           | –, –, –, –              | –, –, –, –          | –, –, –, –              | –, –, –, –            | –, –, –, –               | 4, 4, 1, –, 3      |
| 8   | Uga | Ugao, Serbia, 43° 02' 40" N, 20° 05' 08" E, 1290 m; Leg. A. Hajrudinović-Bogunić & F. Bogunić (no voucher; SARA 60031, GenBank OQ511847, OQ511881)                                                                                                                                                                              | –, –, –, –              | 1, 1, –, –         | –, –, –, –                               | 4, 4, 1, 1, 4           | –, –, –, –              | –, –, –, –          | –, –, –, –              | –, –, –, –            | –, –, –, –               | 5, 5, 1, 1, 4      |
| 9   | Zla | Mt. Zlatar, Serbia, 43° 25' 12" N, 19° 49' 33" E, 1200 m; Leg. A. Hajrudinović-Bogunić & F. Bogunić (SARA 60032, GenBank OQ511838, OQ511872)                                                                                                                                                                                    | –, –, –, –              | –, –, –, –         | –, –, –, –                               | 5, 5, 1, 1, 5           | –, –, –, –              | –, –, –, –          | –, –, –, –              | –, –, –, –            | –, –, –, –               | 5, 5, 1, 1, 5      |
| 10  | Ora | Orahovac, Bijela gora, Bosnia and Herzegovina, 42° 40' 28" N, 18° 30' 28" E, 854 m; Leg. B. Frajman, P. Schönschwetter & M. Falch (SARA 53262)                                                                                                                                                                                  | –, –, –, –              | 2, 2, –, –         | –, –, –, –                               | –, –, –, –              | –, –, –, –              | –, –, –, –          | –, –, –, –              | –, –, –, –            | –, –, –, –               | 2, 2, –, –         |
| 11  | Vrb | Vrba, Bosnia and Herzegovina, 43° 10' 52" N, 18° 34' 06" E, 1090 m; Leg. A. Hajrudinović-Bogunić & F. Bogunić (SARA 51411, GenBank KP794828, KP794854, GenBank OQ511850, OQ511884)                                                                                                                                              | –, –, –, –              | –, –, –, –         | –, –, –, –                               | 5, 5, 2, 5, 5           | –, –, –, –              | –, –, –, –          | –, –, –, –              | –, –, –, –            | –, –, –, –               | 5, 5, 2, 5, 5      |
| 12  | Mag | Mt. Maglić, Bosnia and Herzegovina, 43° 19' 09" N, 18° 42' 47" E, 1304 m; Leg. B. Frajman, P. Schönschwetter & M. Falch (SARA 53263, GenBank OQ511834, OQ511868)                                                                                                                                                                | –, –, –, –              | –, –, –, –         | –, –, –, –                               | 5, 5, 1, –, 5           | –, –, –, –              | –, –, –, –          | –, –, –, –              | –, –, –, –            | –, –, –, –               | 5, 5, 1, –, 5      |
| 13  | Kal | Kalinovik, Bosnia and Herzegovina, 43° 31' 09" N, 18° 26' 50" E, 1134 m; Leg. A. Medić (SARA 53264, GenBank OQ511835, OQ511869)                                                                                                                                                                                                 | –, –, –, –              | –, –, –, –         | –, –, –, –                               | 5, 5, 1, 3, 5           | –, –, –, –              | –, –, –, –          | –, –, –, –              | –, –, –, –            | –, –, –, –               | 5, 5, 1, 3, 5      |
| 14  | Igm | Mt. Igman, Bosnia and Herzegovina, 43° 44' 21" N, 18° 17' 54" E, 1380 m; Leg. A. Hajrudinović-Bogunić & F. Bogunić (SARA 51417, GenBank KP794823, KP794849; SARA 51416, GenBank KP794813, KP794839, GenBank KP794815, KP794841, GenBank KP794816, KP794842; SARA 51418, GenBank KP794825, KP794851, GenBank OQ511833, OQ511867) | 3, 3, 1, 3, –           | 3, 3, 3, 3, –      | –, –, –, –                               | 7, 7, 2, 7, 7           | –, –, –, –              | –, –, –, –          | –, –, –, –              | –, –, –, –            | –, –, –, –               | 13, 13, 6, 13, 7   |
| 15  | Bli | Blidinje lake, Bosnia and Herzegovina, 43° 36' 38" N, 17° 31' 09" E, 1180 m; Leg. A. Hajrudinović-Bogunić & F. Bogunić (SARA 53265, GenBank OQ511829, OQ511863)                                                                                                                                                                 | –, –, –, –              | –, –, –, –         | –, –, –, –                               | 5, 5, 1, 5, 5           | –, –, –, –              | –, –, –, –          | –, –, –, –              | –, –, –, –            | –, –, –, –               | 5, 5, 1, 5, 5      |
| 16  | Gra | Gradac, Bosnia and Herzegovina, 43° 25' 56" N, 17° 23' 27" E, 1200 m; Leg. A. Hajrudinović-Bogunić & F. Bogunić (SARA 53266)                                                                                                                                                                                                    | –, –, –, –              | 3, 3, –, 3, –      | –, –, –, –                               | –, –, –, –              | –, –, –, –              | –, –, –, –          | –, –, –, –              | –, –, –, –            | –, –, –, –               | 3, 3, –, 3, –      |
| 17  | Bio | Mt. Biokovo, Croatia, 43° 19' 09" N, 17° 03' 16" E, 1400 m; Leg. A. Hajrudinović-Bogunić & F. Bogunić (SARA 60033; SARA 60034, GenBank OQ511830, OQ511864)                                                                                                                                                                      | –, –, –, –              | 2, 2, –, 2, –      | –, –, –, –                               | 5, 5, 1, 3, 5           | –, –, –, –              | –, –, –, –          | –, –, –, –              | –, –, –, –            | –, –, –, –               | 6, 6, 1, 4, 5      |
| 18  | Bas | Baške Oštarije, Mt. Velebit, Croatia, 44° 31' 45" N, 15° 11' 11" E, 945 m; Leg. A. Hajrudinović-Bogunić & F. Bogunić (SARA 60035; SARA 60036, GenBank OQ511828, OQ511862)                                                                                                                                                       | 2, 2, –, –              | –, –, –, –         | –, –, –, –                               | 5, 5, 1, –, 5           | –, –, –, –              | –, –, –, –          | –, –, –, –              | –, –, –, –            | –, –, –, –               | 7, 7, 1, –, 5      |
| 19  | Tur | Turček, Slovakia, 48° 44' 39" N, 18° 54' 47" E, 790 m; Leg. C. Németh (Herbarium Cs. Németh 4013/2, GenBank OQ511849, OQ511883)                                                                                                                                                                                                 | –, –, –, –              | –, –, –, –         | –, –, –, –                               | 2, 2, 1, –, 2           | –, –, –, –              | –, –, –, –          | –, –, –, –              | –, –, –, –            | –, –, –, –               | 2, 2, 1, –, 2      |
| 20  | Sin | Siná, Slovakia, 49° 00' 00" N, 19° 34' 18" E, 1150 m; Leg. V. Kučerová (no voucher)                                                                                                                                                                                                                                             | –, –, –, –              | –, –, –, –         | –, –, –, –                               | 3, 3, –, 3              | –, –, –, –              | –, –, –, –          | –, –, –, –              | –, –, –, –            | –, –, –, –               | 3, 3, –, 3         |
| 21  | Pek | Pekárová, Slovakia, 48° 57' 25" N, 18° 57' 51" E, 880 m; Leg. V. Kučerová (no voucher, GenBank OQ511837, OQ511871)                                                                                                                                                                                                              | –, –, –, –              | –, –, –, –         | –, –, –, –                               | –, –, –, –              | –, –, –, –              | –, –, –, –          | 4, 4, 1, –, 4           | –, –, –, –            | –, –, –, –               | 4, 4, 1, –, 4      |
| 22  | Bez | Bezděz hill, Česká Lípa, N Bohemia, Czech Republic, 50° 32' 23" N, 14° 43' 18" E, 580 m; Leg. M. Lepší & P. Lepší, (CB 79599, GenBank OQ511819, OQ511853)                                                                                                                                                                       | –, –, –, –              | –, –, –, –         | –, –, –, –                               | –, –, –, –              | –, –, –, –              | 1, 1, 1, –,         | –, –, –, –              | –, –, –, –            | –, –, –, –               | 1, 1, 1, –,        |
| 23  | Fal | Fallenstein, Nordostliche Kalkalpen, Austria, 47° 44' 06" N, 15° 20' 16" E, 940 m; Leg. W. Gutermann, D. Reich, R. Sander, M. Hofbauer, C. Gilli, B. Weis & M. Thalinger (SARA 60040; SARA 60041; SARA 60042, GenBank OQ511823, OQ511857, GenBank OQ511824, OQ511858)                                                           | 2, 2, –, –              | 3, 3, –, –         | –, –, –, –                               | 5, 5, 2, –, 5           | –, –, –, –              | –, –, –, –          | –, –, –, –              | –, –, –, –            | –, –, –, –               | 10, 10, 2, –, 5    |
| 24  | Ker | Kerngraben, Altenberg an der Rax, Steiermark, Austria, 47° 41' 11" N, 15° 39' 19" E, 950 m; Leg. A. Tribsch (SARA 60043, GenBank OQ511831, OQ511865)                                                                                                                                                                            | –, –, –, –              | –, –, –, –         | –, –, –, –                               | 5, 5, 1, –, 5           | –, –, –, –              | –, –, –, –          | –, –, –, –              | –, –, –, –            | –, –, –, –               | 5, 5, 1, –, 5      |
| 25  | Kar | Karavanke, Slovenia, 46° 27' 59" N, 13° 59' 26" E, 1050 m; Leg. R. Brus (SARA 60037, GenBank OQ511832, OQ511866)                                                                                                                                                                                                                | –, –, –, –              | –, –, –, –         | –, –, –, –                               | 5, 5, 1, –, 5           | –, –, –, –              | –, –, –, –          | –, –, –, –              | –, –, –, –            | –, –, –, –               | 5, 5, 1, –, 5      |
| 26  | Dob | Dobratsch, Gailtaler Alpen, Austria, 46° 35' 28" N, 13° 43' 43" E, 1500 m; Leg. B. Frajman & P. Schönschwetter (SARA 60044; SARA 60045; SARA 60046, GenBank OQ511836, OQ511870)                                                                                                                                                 | 2, 2, –, –              | 2, 2, –, –         | –, –, –, –                               | 5, 5, 1, –, 5           | –, –, –, –              | –, –, –, –          | –, –, –, –              | –, –, –, –            | –, –, –, –               | 9, 9, 1, –, 5      |
| 27  | Sch | Schafberg bei St. Wolfgang, Flachgau, Salzburg, Austria, 47° 46' 23" N, 13° 26' 26" E, 1650 m; Leg. P. Pilsł (Herbarium Peter Pilsł 19097, GenBank OQ511843, OQ511877, GenBank OQ511845, OQ511879)                                                                                                                              | –, –, –, –              | –, –, –, –         | –, –, –, –                               | 3, 3, 2, –,             | –, –, –, –              | –, –, –, –          | –, –, –, –              | –, –, –, –            | –, –, –, –               | 3, 3, 2, –,        |
| 28  | Bre | Breitenstein, Bayerische Voralpen, Germany, 47° 43' 55" N, 12° 00' 55" E, 920 m; Leg. P. Schönschwetter (SARA 60038; SARA 60039, GenBank OQ511822, OQ511856)                                                                                                                                                                    | 2, 2, –, –              | 7, 7, 1, –,        | –, –, –, –                               | –, –, –, –              | –, –, –, –              | –, –, –, –          | –, –, –, –              | –, –, –, –            | –, –, –, –               | 9, 9, 1, –,        |
| 29  | Nor | Nordkette, Karwendel, Tirol, Austria, 47° 16' 41" N, 11° 20' 49" E, 970 m; Leg. B. Frajman & P. Schönschwetter (SARA 60047)                                                                                                                                                                                                     | –, –, –, –              | 3, 3, –, –         | –, –, –, –                               | –, –, –, –              | –, –, –, –              | –, –, –, –          | –, –, –, –              | –, –, –, –            | –, –, –, –               | 3, 3, –, –         |
| 30  | Mie | Mieminger Gebirge, Tirol, Austria, 47° 19' 39" N, 10° 57' 58" E, 1100 m; Leg. M. Falch (SARA 60048, GenBank OQ511820, OQ511854)                                                                                                                                                                                                 | –, –, –, –              | 5, 5, 1, –,        | –, –, –, –                               | –, –, –, –              | –, –, –, –              | –, –, –, –          | –, –, –, –              | –, –, –, –            | –, –, –, –               | 5, 5, 1, –,        |
| 31  | Sta | Stanzertal, Vorarlberg, Austria, 47° 08' 53" N, 10° 19' 07" E, 1320 m; Leg. P. Schönschwetter (SARA 60049; SARA 60050; SARA 60051, GenBank OQ511825, OQ511859)                                                                                                                                                                  | 2, 2, –, –              | 2, 2, –, –         | –, –, –, –                               | –, –, –, –              | 3, 3, 1, –, 3           | –, –, –, –          | –, –, –, –              | –, –, –, –            | –, –, –, –               | 7, 7, 1, –, 3      |
| 32  | Mon | Schruns, Montafon, Vorarlberg, Austria, 47° 06' 02" N, 09° 56' 57" E, 1120 m; Leg. P. Schönschwetter & B. Frajman (SARA 60052; SARA 60053, GenBank OQ511818, OQ511852)                                                                                                                                                          | 2, 2, –, –              | 6, 6, 1, –,        | –, –, –, –                               | –, –, –, –              | –, –, –, –              | –, –, –, –          | –, –, –, –              | –, –, –, –            | –, –, –, –               | 8, 8, 1, –,        |
| 33  | Uit | Uitikon, Zurich, Switzerland, 47° 21' 55" N, 08° 27' 49" E, 630 m; Leg. F. Gugerli (SARA 60054, GenBank OQ511827, OQ511861)                                                                                                                                                                                                     | –, –, –, –              | –, –, –, –         | –, –, –, –                               | –, –, –, –              | 1, 1, 1, –, 1           | –, –, –, –          | –, –, –, –              | –, –, –, –            | –, –, –, –               | 1, 1, 1, –, 1      |
| 34  | Wal | Walliser Alpen, Switzerland, 46° 01' 57" N, 07° 06' 03" E, 1540 m; Leg. C. Pachschnoll & J. Theurillat (no voucher, GenBank OQ511846, OQ511880)                                                                                                                                                                                 | –, –, –, –              | –, –, –, –         | –, –, –, –                               | –, –, –, –              | 1, 1, 1, –, 1           | –, –, –, –          | –, –, –, –              | –, –, –, –            | –, –, –, –               | 1, 1, 1, –, 1      |

|                 |     |                                                                                                                                                                                                                                                                      |                 |                   |               |                    |               |               |               |               |               |                      |
|-----------------|-----|----------------------------------------------------------------------------------------------------------------------------------------------------------------------------------------------------------------------------------------------------------------------|-----------------|-------------------|---------------|--------------------|---------------|---------------|---------------|---------------|---------------|----------------------|
| 35              | Pob | Poblet, Spain, 41° 21' 56" N, 01° 04' 48" E, 830 m; Leg. J. Vallès (SARA 60055)                                                                                                                                                                                      | –, –, –, –      | 3, 2, –, 3, –     | –, –, –, –    | –, –, –, –         | –, –, –, –    | –, –, –, –    | –, –, –, –    | –, –, –, –    | –, –, –, –    | 3, 2, –, 3, –        |
| 36              | Shp | Ship Rock, Coldwell Rocks, Symonds Yat, Gloucestershire, England, UK, 51° 50' 18" N, 02° 37' 27" W, 120m; Leg. T. Rich (NBGW 1341a,b; NBGW 1384a,b, GenBank OQ511826, OQ511860)                                                                                      | –, –, –, –      | –, –, –, –        | –, –, –, –    | –, –, –, –         | –, –, –, –    | –, –, –, –    | –, –, –, –    | 5, 5, 1, –, – | –, –, –, –    | 5, 5, 1, –, –        |
| 37              | Cre | Creigiau Eglwyseg, Denbighshire, Wales, UK, 52° 59' 53" N, 03° 09' 50" W, 380m; Leg. T. Knight (cultivated at NBGW, GenBank OQ511839, OQ511873)                                                                                                                      | –, –, –, –      | –, –, –, –        | –, –, –, –    | –, –, –, –         | –, –, –, –    | –, –, –, –    | –, –, –, –    | –, –, –, –    | 5, 5, 1, –, – | 5, 5, 1, –, –        |
| 38*             | Skr | Mali i Tomorit, Skrapar, Albania, 40° 37' 12" N, 20° 11' 31" E, 1542 m (SARA 60023, GenBank OQ511817, OQ511851)                                                                                                                                                      | –, –, –, –      | –, –, 1, –, –     | –, –, –, –    | –, –, –, –         | –, –, –, –    | –, –, –, –    | –, –, –, –    | –, –, –, –    | –, –, –, –    | –, –, 1, –, –        |
| 39*             | Umo | Umoljani, Mt. Bjelašnica, Bosnia and Herzegovina, 43° 39' 31" N, 18° 13' 49" E, 1260m; Leg. A. Hajrudinović, F. Bogunić (SARA 51413, GenBank KP794814, KP794840, GenBank KP794817, KP794843; SARA 51414, GenBank KP794827, KP794853)                                 | –, –, –, –      | –, –, 2, –, –     | –, –, –, –    | –, –, 1, –, –      | –, –, –, –    | –, –, –, –    | –, –, –, –    | –, –, –, –    | –, –, –, –    | –, –, 3, –, –        |
| 40*             | Kru | Mt. Krug planina, Bosnia and Herzegovina, 43° 50' 32" N, 17° 11' 59" E, 1300m; Leg. A. Hajrudinović, F. Bogunić (SARA 51408, GenBank KP794824, KP794850; SARA 51406, GenBank KP794811, KP794837, GenBank KP794812, KP794838; SARA 51409, GenBank KP794826, KP794852) | –, –, 1, –, –   | –, –, 2, –, –     | –, –, –, –    | –, –, 1, –, –      | –, –, –, –    | –, –, –, –    | –, –, –, –    | –, –, –, –    | –, –, –, –    | –, –, 4, –, –        |
| 41*             | Slo | Mt. Slovinj, Bosnia and Herzegovina, 43° 59' 41" N, 16° 59' 06" E, 1350 m; Leg. A. Hajrudinović, F. Bogunić (SARA 51410, GenBank KP794809, KP794835)                                                                                                                 | –, –, –, –      | –, –, 1, –, –     | –, –, –, –    | –, –, –, –         | –, –, –, –    | –, –, –, –    | –, –, –, –    | –, –, –, –    | –, –, –, –    | –, –, 1, –, –        |
| 42*             | Hai | Hainburg, Niederösterreich, Austria (FC382 from Pellicer <i>et al.</i> 2012, GenBank KP794807, KP794833)                                                                                                                                                             | –, –, –, –      | –, –, 1, –, –     | –, –, –, –    | –, –, –, –         | –, –, –, –    | –, –, –, –    | –, –, –, –    | –, –, –, –    | –, –, –, –    | –, –, 1, –, –        |
| 43*             | Fus | Fuschlsee, Salzburg, Austria, 47° 48' 54" N, 13° 15' 14" E, 665 m; Leg. A. Tribsch (AT 112316, GenBank OQ511842, OQ511876)                                                                                                                                           | –, –, –, –      | –, –, –, –        | –, –, –, –    | –, –, 1, –, –      | –, –, –, –    | –, –, –, –    | –, –, –, –    | –, –, –, –    | –, –, –, –    | –, –, 1, –, –        |
| 44*             | Inn | Innsbruck, Tirol, Austria, 47° 16' 37" N, 11° 22' 35" E, 900 m; Leg. P. Schönswetter, B. Frajman, A. Hajrudinović (no vouchers; GenBank KP794818, KP794844; GenBank KP794806, KP794832)                                                                              | –, –, 1, –, –   | –, –, 1, –, –     | –, –, –, –    | –, –, –, –         | –, –, –, –    | –, –, –, –    | –, –, –, –    | –, –, –, –    | –, –, –, –    | –, –, 2, –, –        |
| 45*             | Pla | The Plain, Leigh Woods, England, UK (FC007 from Pellicer <i>et al.</i> 2012, GenBank KP794820, KP794846)                                                                                                                                                             | –, –, 1, –, –   | –, –, –, –        | –, –, –, –    | –, –, –, –         | –, –, –, –    | –, –, –, –    | –, –, –, –    | –, –, –, –    | –, –, –, –    | –, –, 1, –, –        |
| 46*             | Off | Offa's Dyke, Tidenham Chase, Wales, UK (FC154 from Pellicer <i>et al.</i> 2012, GenBank KP794808, KP794834)                                                                                                                                                          | –, –, –, –      | –, –, 1, –, –     | –, –, –, –    | –, –, –, –         | –, –, –, –    | –, –, –, –    | –, –, –, –    | –, –, –, –    | –, –, –, –    | –, –, 1, –, –        |
| 47*             | Uus | Uusimaa, Vihti, Finland (FC370 from Pellicer <i>et al.</i> 2012, GenBank KP794821, KP794847)                                                                                                                                                                         | –, –, 1, –, –   | –, –, –, –        | –, –, –, –    | –, –, –, –         | –, –, –, –    | –, –, –, –    | –, –, –, –    | –, –, –, –    | –, –, –, –    | –, –, 1, –, –        |
| TOTAL per taxon |     |                                                                                                                                                                                                                                                                      | 17, 17, 5, 5, – | 45, 44, 15, 11, – | 3, 3, 1, 1, 3 | 87, 87, 26, 28, 84 | 5, 5, 3, –, 5 | 1, 1, 1, –, – | 4, 4, 1, –, 4 | 5, 5, 1, –, – | 5, 5, 1, –, – | 172, 171, 54, 45, 96 |

\*Additional localities used only in plastid DNA analysis; samples from 39\* to 47\* are published in Hajrudinović *et al.* (2015a).

**Table S2.** Indices of population clonal diversity based on nuclear microsatellite data for the studied populations of *Sorbus* subgen. *Soraria*.

| Nb. | Locality No. | Number of individuals sampled ( <i>N</i> ) | Number of multilocus genotypes detected per locality ( <i>N<sub>g</sub></i> ) | Effective number of genotypes ( <i>Eff</i> ) | Genotypic diversity ( <i>Div</i> ) |
|-----|--------------|--------------------------------------------|-------------------------------------------------------------------------------|----------------------------------------------|------------------------------------|
| 1.  | 2            | 5                                          | 1                                                                             | 1                                            | 0                                  |
| 2.  | 3            | 3                                          | 1                                                                             | 1                                            | 0                                  |
| 3.  | 4            | 3                                          | 1                                                                             | 1                                            | 0                                  |
| 4.  | 6            | 2                                          | 1                                                                             | 1                                            | 0                                  |
| 5.  | 7            | 3                                          | 3                                                                             | 3                                            | 1                                  |
| 6.  | 8            | 4                                          | 2                                                                             | 2                                            | 0.67                               |
| 7.  | 9            | 5                                          | 1                                                                             | 1                                            | 0                                  |
| 8.  | 11           | 5                                          | 2                                                                             | 1.47                                         | 0.4                                |
| 9.  | 12           | 5                                          | 1                                                                             | 1                                            | 0                                  |
| 10. | 13           | 5                                          | 1                                                                             | 1                                            | 0                                  |
| 11. | 14           | 7                                          | 3                                                                             | 2.33                                         | 0.67                               |
| 12. | 15           | 5                                          | 3                                                                             | 2.78                                         | 0.8                                |
| 13. | 17           | 5                                          | 1                                                                             | 1                                            | 0                                  |
| 14. | 18           | 5                                          | 1                                                                             | 1                                            | 0                                  |
| 15. | 19           | 2                                          | 1                                                                             | 1                                            | 0                                  |
| 16. | 20           | 3                                          | 1                                                                             | 1                                            | 0                                  |
| 17. | 21           | 4                                          | 1                                                                             | 1                                            | 0                                  |
| 18. | 22           | 1                                          | 1                                                                             | 1                                            | /                                  |
| 19. | 23           | 5                                          | 1                                                                             | 1                                            | 0                                  |
| 20. | 24           | 5                                          | 1                                                                             | 1                                            | 0                                  |
| 21. | 25           | 5                                          | 1                                                                             | 1                                            | 0                                  |
| 22. | 26           | 5                                          | 1                                                                             | 1                                            | 0                                  |
| 23. | 27           | 3                                          | 1                                                                             | 1                                            | 0                                  |
| 24. | 31           | 3                                          | 1                                                                             | 1                                            | 0                                  |
| 25. | 33           | 1                                          | 1                                                                             | 1                                            | /                                  |
| 26. | 34           | 1                                          | 1                                                                             | 1                                            | /                                  |
| 27. | 36           | 5                                          | 1                                                                             | 1                                            | 0                                  |
| 28. | 37           | 5                                          | 2                                                                             | 1.92                                         | 0.60                               |
| 110 |              |                                            |                                                                               |                                              |                                    |

**Table S3.** Allele composition in six nuclear microsatellite loci for the presumed parental taxa of *Sorbus* subgen. *Soraria*.

| Taxon               | Ploidy* | MSS13                                     | MSS5                                                             | CH01F02                                   | D11                                                                                                                         | MSS16                                | H10                                             | N of individuals | N of localities |
|---------------------|---------|-------------------------------------------|------------------------------------------------------------------|-------------------------------------------|-----------------------------------------------------------------------------------------------------------------------------|--------------------------------------|-------------------------------------------------|------------------|-----------------|
| <i>S. aria</i>      | 2x      | 193, 191, 195, 197,<br>199, 201, 207, 211 | 120, 110, 114, 116,<br>118, 122, 124, 126,<br>130, 136, 138, 140 | 190, 194, 196, 198,<br>200, 202, 214      | 137, 139, 145, 147,<br>149, 151, 153, 155,<br>157, 161, 167, 173,<br>175, 177, 179, 181,<br>185, 187, 189, 195,<br>199, 205 | 154, 156, 158, 160,<br>162, 164, 166 | 78, 80, 82, 84, 88,<br>90, 92, 96               | 24               | 9               |
| <i>S. aria</i>      | 3x      | 189, 193, 195, 197,<br>199, 211           | 110, 112, 120, 122,<br>124, 126, 128, 130,<br>134, 150           | 190, 192, 196, 198,<br>200, 202, 214      | 137, 147, 149, 151,<br>153, 157, 161, 163,<br>165, 173, 177, 179,<br>181, 201, 203, 215                                     | 154, 158, 160, 162,<br>164, 166      | 78, 80, 82, 88, 90,<br>92, 104, 110             | 13               | 7               |
| <i>S. aria</i>      | 4x      | 187, 191, 193, 195,<br>197, 199, 201, 203 | 110, 112, 114, 116,<br>118, 122, 124, 128,<br>130, 132           | 190, 196, 198, 200,<br>202, 204, 215, 216 | 137, 149, 151, 153,<br>169, 175, 179, 185,<br>205                                                                           | 154, 156, 158, 160,<br>162, 166, 170 | 78, 82, 90, 92                                  | 7                | 6               |
| <i>S. aucuparia</i> | 2x      | 181, 183, 185, 187,<br>189, 191, 193, 195 | 98, 96, 97, 99, 100,<br>114, 126, 130                            | 186, 188                                  | 131, 139, 141, 145,<br>147, 149, 157                                                                                        | 154, 156, 158                        | 86, 88, 90, 92, 94,<br>96, 98, 102, 104,<br>106 | 17               | 8               |
| <b>Total</b>        |         |                                           |                                                                  |                                           |                                                                                                                             |                                      |                                                 | <b>61</b>        |                 |

\*estimated from nuclear microsatellites.

**Table S4.** Results of principal component analysis (PCA, see Figure S2) and canonical discriminant analysis (CDA, see Figure S3) of *Soraria* individuals based on the morphological characters of leaves.

| Leaf character | PCA eigenvectors |             | CDA total canonical structure values |              |
|----------------|------------------|-------------|--------------------------------------|--------------|
|                | PC 1             | PC 2        | DF 1                                 | DF 1         |
| LLEAV          | 0.25             | 0.14        | -0.09                                | -0.12        |
| LPET           | 0.18             | 0.13        | -0.08                                | -0.12        |
| 1SEINL         | 0.21             | -0.09       | -0.26                                | 0.11         |
| 1NERV          | 0.28             | -0.31       | <b>-0.37</b>                         | -0.15        |
| 2SEINL         | 0.29             | 0.02        | -0.19                                | -0.11        |
| 2NERV          | <b>0.34</b>      | -0.17       | <b>-0.33</b>                         | -0.32        |
| 3SEINL         | 0.28             | 0.09        | -0.20                                | -0.13        |
| 3NERV          | <b>0.34</b>      | -0.06       | -0.29                                | <b>-0.47</b> |
| WLEAV          | <b>0.35</b>      | 0.02        | -0.31                                | <b>-0.62</b> |
| MXWLEAV        | 0.16             | 0.10        | 0.01                                 | -0.30        |
| 1NANG          | 0.17             | <b>0.36</b> | -0.06                                | -0.29        |
| 2NANG          | 0.07             | <b>0.47</b> | 0.09                                 | -0.32        |
| 3NANG          | 0.03             | <b>0.49</b> | 0.07                                 | 0.10         |
| 1ALEAV         | 0.24             | -0.10       | -0.26                                | -0.27        |
| 1BLEAV         | 0.11             | 0.18        | -0.01                                | -0.19        |
| NNER           | 0.00             | <b>0.41</b> | <b>0.35</b>                          | <b>-0.52</b> |
| LLEAV / WLEAV  | -0.28            | 0.08        | <b>0.52</b>                          | <b>0.54</b>  |
| WLEAV / MXLEAV | 0.22             | -0.06       | 0.05                                 | -0.10        |



**Table S5.** Classification matrix with Jackknife procedure (82% of cases correctly classified) for the dataset of analysed *Sorbus* individuals based on morphometric leaf measurements (groups are defined according to AFLP clusters, Figure 1B).

| AFLP group                                                    | d | j | f  | c  | g | i | h | k | b | e | a | l | Individuals<br>in predefined<br>AFLP<br>groups | Number of<br>correctly<br>classified<br>individuals |
|---------------------------------------------------------------|---|---|----|----|---|---|---|---|---|---|---|---|------------------------------------------------|-----------------------------------------------------|
| d                                                             | 5 | 0 | 0  | 0  | 0 | 0 | 0 | 0 | 0 | 0 | 0 | 0 | 5                                              | 5                                                   |
| j                                                             | 0 | 5 | 0  | 0  | 0 | 0 | 1 | 0 | 0 | 0 | 0 | 0 | 6                                              | 5                                                   |
| f                                                             | 0 | 0 | 28 | 0  | 2 | 0 | 0 | 0 | 0 | 1 | 1 | 2 | 34                                             | 28                                                  |
| c                                                             | 0 | 0 | 0  | 19 | 0 | 1 | 1 | 0 | 0 | 0 | 0 | 0 | 21                                             | 19                                                  |
| g                                                             | 0 | 0 | 0  | 0  | 3 | 0 | 0 | 0 | 0 | 0 | 0 | 0 | 3                                              | 3                                                   |
| i                                                             | 0 | 0 | 0  | 0  | 0 | 1 | 1 | 0 | 0 | 0 | 0 | 0 | 2                                              | 1                                                   |
| h                                                             | 0 | 1 | 0  | 0  | 0 | 1 | 1 | 0 | 0 | 0 | 0 | 0 | 3                                              | 1                                                   |
| k                                                             | 0 | 0 | 0  | 0  | 0 | 0 | 0 | 4 | 0 | 0 | 0 | 0 | 4                                              | 4                                                   |
| b                                                             | 0 | 0 | 0  | 0  | 0 | 0 | 0 | 0 | 4 | 0 | 1 | 0 | 5                                              | 4                                                   |
| e                                                             | 0 | 0 | 0  | 0  | 0 | 0 | 0 | 0 | 0 | 5 | 0 | 0 | 5                                              | 5                                                   |
| a                                                             | 0 | 0 | 0  | 0  | 0 | 0 | 0 | 0 | 1 | 0 | 4 | 0 | 5                                              | 4                                                   |
| l                                                             | 0 | 0 | 2  | 0  | 0 | 0 | 0 | 0 | 0 | 1 | 0 | 0 | 3                                              | 0                                                   |
| Individuals in<br><i>a posteriori</i><br>classified<br>groups | 5 | 6 | 30 | 19 | 5 | 3 | 4 | 4 | 5 | 7 | 6 | 2 | 96                                             | 79 (82%)                                            |

**Table S6.** Classification matrix with Jackknife procedure (88% of cases correctly classified) for the dataset of analysed *Sorbus austriaca* individuals based on morphometric leaf measurements (groups are defined according to AFLP clusters, Figure 1B).

| AFLP group                                           | d | j | f  | c  | g | i | h | b | e | Individuals in predefined AFLP groups | Number of correctly classified individuals |
|------------------------------------------------------|---|---|----|----|---|---|---|---|---|---------------------------------------|--------------------------------------------|
| d                                                    | 5 | 0 | 0  | 0  | 0 | 0 | 0 | 0 | 0 | 5                                     | 5                                          |
| j                                                    | 0 | 5 | 0  | 0  | 0 | 0 | 1 | 0 | 0 | 6                                     | 5                                          |
| f                                                    | 0 | 0 | 31 | 0  | 2 | 1 | 0 | 0 | 0 | 34                                    | 31                                         |
| c                                                    | 0 | 0 | 0  | 18 | 0 | 1 | 1 | 1 | 0 | 21                                    | 18                                         |
| g                                                    | 0 | 0 | 0  | 0  | 3 | 0 | 0 | 0 | 0 | 3                                     | 3                                          |
| i                                                    | 0 | 0 | 0  | 0  | 0 | 2 | 0 | 0 | 0 | 2                                     | 2                                          |
| h                                                    | 0 | 1 | 0  | 0  | 0 | 1 | 1 | 0 | 0 | 3                                     | 1                                          |
| b                                                    | 0 | 0 | 1  | 0  | 0 | 0 | 0 | 4 | 0 | 5                                     | 4                                          |
| e                                                    | 0 | 0 | 0  | 0  | 0 | 0 | 0 | 0 | 5 | 5                                     | 5                                          |
| Individuals in <i>a posteriori</i> classified groups | 5 | 6 | 32 | 18 | 5 | 5 | 3 | 5 | 5 | 84                                    | 74 (88%)                                   |

**Table S7.** Descriptive statistics of leaf morphometrics for *Sorbus* subgen. *Soraria* individuals presented for AFLP groups.

| AFLP cluster | Taxon                                | Group count | Descriptive statistics | LLEAV       | LPET        | ISEINL     | INERV       | 2SEINL     | 2NERV       | 3SEINL     | 3NERV       | WLEAV       | MXWLEAV     | 1NANG       | 2NANG       | 3NANG       | 1ALEAV      | 1BLEAV      | NNER        |
|--------------|--------------------------------------|-------------|------------------------|-------------|-------------|------------|-------------|------------|-------------|------------|-------------|-------------|-------------|-------------|-------------|-------------|-------------|-------------|-------------|
| <b>a</b>     | <i>S. mougeotii</i>                  | <b>5</b>    | Ar. mean               | <b>74.5</b> | <b>11.9</b> | <b>2.3</b> | <b>28.4</b> | <b>3.0</b> | <b>33.2</b> | <b>4.0</b> | <b>34.6</b> | <b>47.5</b> | <b>41.8</b> | <b>54.2</b> | <b>45.1</b> | <b>39.2</b> | <b>28.6</b> | <b>22.8</b> | <b>7.5</b>  |
|              |                                      |             | SD                     | 9.6         | 4.2         | 1.3        | 2.5         | 1.2        | 5.0         | 1.8        | 3.9         | 6.8         | 5.0         | 4.9         | 3.8         | 3.7         | 5.6         | 5.1         | 1.1         |
|              |                                      |             | Min                    | 63.3        | 6.0         | 1.0        | 24.0        | 2.0        | 26.0        | 2.3        | 31.0        | 41.7        | 33.3        | 48.3        | 40.7        | 35.0        | 23.0        | 16.0        | 6.3         |
|              |                                      |             | Max                    | 84.3        | 15.3        | 3.7        | 30.0        | 4.3        | 38.0        | 6.0        | 39.0        | 55.0        | 45.0        | 60.0        | 50.0        | 42.0        | 34.7        | 30.3        | 8.7         |
|              |                                      |             | CV%                    | 12.9        | 35.0        | 56.2       | 8.8         | 40.0       | 14.9        | 43.5       | 11.3        | 14.2        | 12.0        | 9.0         | 8.4         | 9.4         | 19.7        | 22.6        | 14.0        |
| <b>b</b>     | <i>S. austriaca</i>                  | <b>5</b>    | Ar. mean               | <b>77.8</b> | <b>14.6</b> | <b>6.4</b> | <b>28.4</b> | <b>5.9</b> | <b>31.8</b> | <b>5.0</b> | <b>32.9</b> | <b>49.3</b> | <b>33.9</b> | <b>54.4</b> | <b>50.8</b> | <b>42.1</b> | <b>24.7</b> | <b>29.5</b> | <b>8.0</b>  |
|              |                                      |             | SD                     | 11.2        | 4.2         | 4.1        | 3.5         | 2.2        | 3.5         | 1.2        | 3.1         | 5.0         | 2.4         | 3.0         | 6.2         | 3.1         | 3.3         | 6.0         | 0.7         |
|              |                                      |             | Min                    | 65.0        | 7.5         | 2.5        | 25.3        | 3.0        | 29.0        | 4.0        | 27.5        | 43.0        | 31.3        | 51.3        | 43.5        | 37.5        | 19.5        | 21.5        | 7.0         |
|              |                                      |             | Max                    | 96.0        | 18.0        | 12.5       | 34.0        | 8.0        | 37.5        | 7.0        | 35.5        | 54.5        | 37.0        | 58.3        | 58.0        | 45.0        | 28.0        | 37.7        | 8.7         |
|              |                                      |             | CV%                    | 14.4        | 28.6        | 64.5       | 12.3        | 37.7       | 11.1        | 24.9       | 9.5         | 10.1        | 7.1         | 5.5         | 12.1        | 7.3         | 13.2        | 20.4        | 9.0         |
| <b>c</b>     | <i>S. austriaca</i>                  | <b>21</b>   | Ar. mean               | <b>90.1</b> | <b>18.0</b> | <b>3.4</b> | <b>28.0</b> | <b>5.4</b> | <b>37.4</b> | <b>5.9</b> | <b>39.6</b> | <b>57.8</b> | <b>45.1</b> | <b>57.2</b> | <b>50.2</b> | <b>45.3</b> | <b>25.8</b> | <b>30.9</b> | <b>10.4</b> |
|              |                                      |             | SD                     | 4.6         | 3.5         | 1.3        | 3.4         | 1.6        | 4.2         | 1.6        | 3.6         | 6.5         | 4.9         | 2.5         | 2.4         | 3.2         | 4.2         | 5.9         | 0.8         |
|              |                                      |             | Min                    | 78.7        | 11.0        | 1.0        | 23.2        | 3.2        | 29.0        | 3.0        | 33.7        | 41.0        | 35.0        | 52.3        | 45.7        | 37.7        | 16.0        | 23.0        | 9.0         |
|              |                                      |             | Max                    | 97.0        | 23.0        | 7.0        | 36.0        | 10.0       | 47.0        | 9.0        | 48.0        | 70.0        | 53.8        | 61.0        | 55.1        | 54.0        | 35.0        | 44.0        | 12.0        |
|              |                                      |             | CV%                    | 5.1         | 19.3        | 37.2       | 12.2        | 29.8       | 11.2        | 26.3       | 9.1         | 11.2        | 10.8        | 4.3         | 4.7         | 7.1         | 16.4        | 19.1        | 7.4         |
| <b>d</b>     | <i>S. austriaca</i>                  | <b>5</b>    | Ar. mean               | <b>70.0</b> | <b>9.0</b>  | <b>3.2</b> | <b>25.6</b> | <b>4.3</b> | <b>29.6</b> | <b>3.7</b> | <b>28.6</b> | <b>38.8</b> | <b>33.4</b> | <b>44.8</b> | <b>41.8</b> | <b>39.8</b> | <b>20.0</b> | <b>22.4</b> | <b>7.6</b>  |
|              |                                      |             | SD                     | 4.8         | 0.0         | 1.0        | 3.7         | 2.1        | 3.1         | 1.3        | 2.9         | 2.3         | 2.9         | 6.6         | 7.1         | 6.5         | 3.5         | 5.3         | 0.9         |
|              |                                      |             | Min                    | 62.0        | 9.0         | 2.0        | 21.0        | 3.0        | 25.0        | 2.5        | 24.0        | 36.0        | 30.0        | 40.0        | 36.0        | 32.0        | 14.0        | 15.0        | 7.0         |
|              |                                      |             | Max                    | 75.0        | 9.0         | 4.5        | 31.0        | 8.0        | 33.0        | 5.0        | 31.0        | 42.0        | 37.0        | 56.0        | 54.0        | 50.0        | 22.0        | 30.0        | 9.0         |
|              |                                      |             | CV%                    | 6.9         | 0.0         | 32.4       | 14.5        | 49.1       | 10.6        | 33.9       | 10.1        | 5.9         | 8.6         | 14.8        | 17.0        | 16.3        | 17.3        | 23.7        | 11.8        |
| <b>e</b>     | <i>S. austriaca</i>                  | <b>5</b>    | Ar. mean               | <b>82.2</b> | <b>17.0</b> | <b>3.4</b> | <b>35.5</b> | <b>5.5</b> | <b>41.0</b> | <b>7.4</b> | <b>41.0</b> | <b>61.0</b> | <b>37.5</b> | <b>51.0</b> | <b>49.5</b> | <b>42.0</b> | <b>23.8</b> | <b>28.8</b> | <b>8.6</b>  |
|              |                                      |             | SD                     | 0.7         | 0.7         | 0.3        | 0.4         | 0.4        | 0.7         | 0.3        | 0.7         | 0.7         | 0.4         | 0.7         | 0.4         | 0.7         | 0.5         | 0.5         | 0.5         |
|              |                                      |             | Min                    | 81.0        | 16.0        | 3.0        | 35.0        | 5.0        | 40.0        | 7.0        | 40.0        | 60.0        | 37.0        | 50.0        | 49.0        | 41.0        | 23.0        | 28.0        | 8.0         |
|              |                                      |             | Max                    | 83.0        | 18.0        | 3.7        | 36.0        | 6.0        | 42.0        | 7.7        | 42.0        | 62.0        | 38.0        | 52.0        | 50.0        | 43.0        | 24.5        | 29.5        | 9.0         |
|              |                                      |             | CV%                    | 0.9         | 4.2         | 7.5        | 1.0         | 6.4        | 1.7         | 3.4        | 1.7         | 1.2         | 0.9         | 1.4         | 0.7         | 1.7         | 2.3         | 1.9         | 6.4         |
| <b>f</b>     | <i>S. austriaca</i>                  | <b>34</b>   | Ar. mean               | <b>84.4</b> | <b>16.2</b> | <b>4.8</b> | <b>37.9</b> | <b>6.3</b> | <b>44.3</b> | <b>5.8</b> | <b>44.0</b> | <b>62.9</b> | <b>40.8</b> | <b>51.4</b> | <b>43.6</b> | <b>37.4</b> | <b>31.3</b> | <b>28.7</b> | <b>7.8</b>  |
|              |                                      |             | SD                     | 8.5         | 3.0         | 1.4        | 3.9         | 1.6        | 4.0         | 1.0        | 4.3         | 6.1         | 5.5         | 4.7         | 3.6         | 4.1         | 2.7         | 5.3         | 0.6         |
|              |                                      |             | Min                    | 61.0        | 8.0         | 2.5        | 27.0        | 2.5        | 36.0        | 3.5        | 33.5        | 50.0        | 31.0        | 41.0        | 33.5        | 27.5        | 24.8        | 18.0        | 6.5         |
|              |                                      |             | Max                    | 109         | 21.2        | 10.0       | 46.0        | 11.0       | 55.0        | 7.5        | 55.6        | 81.0        | 58.0        | 62.0        | 52.0        | 47.2        | 38.2        | 42.4        | 8.8         |
|              |                                      |             | CV%                    | 10.0        | 18.8        | 29.5       | 10.2        | 25.2       | 9.1         | 17.6       | 9.8         | 9.8         | 13.6        | 9.1         | 8.3         | 10.9        | 8.6         | 18.3        | 7.7         |
| <b>g</b>     | <i>S. austriaca</i>                  | <b>3</b>    | Ar. mean               | <b>91.3</b> | <b>21.4</b> | <b>5.2</b> | <b>38.8</b> | <b>7.2</b> | <b>46.3</b> | <b>7.0</b> | <b>48.5</b> | <b>61.8</b> | <b>49.7</b> | <b>49.5</b> | <b>43.1</b> | <b>37.1</b> | <b>31.1</b> | <b>17.1</b> | <b>9.0</b>  |
|              |                                      |             | SD                     | 0.8         | 1.6         | 0.6        | 2.6         | 1.3        | 3.7         | 0.6        | 3.1         | 2.6         | 2.8         | 0.4         | 1.2         | 1.4         | 1.4         | 2.1         | 0.0         |
|              |                                      |             | Min                    | 90.4        | 19.8        | 4.7        | 36.0        | 6.1        | 42.0        | 6.5        | 45.0        | 60.0        | 46.6        | 49.2        | 42.0        | 36.2        | 29.6        | 14.8        | 9.0         |
|              |                                      |             | Max                    | 91.8        | 23.0        | 5.9        | 41.2        | 8.7        | 48.6        | 7.7        | 50.8        | 64.8        | 52.2        | 50.0        | 44.4        | 38.8        | 32.4        | 19.0        | 9.0         |
|              |                                      |             | CV%                    | 0.9         | 7.5         | 11.7       | 6.8         | 18.4       | 8.0         | 7.7        | 6.4         | 4.2         | 5.7         | 0.8         | 2.8         | 3.9         | 4.6         | 12.5        | 0.0         |
| <b>h</b>     | <i>S. austriaca</i>                  | <b>3</b>    | Ar. mean               | <b>88.7</b> | <b>11.0</b> | <b>1.8</b> | <b>30.0</b> | <b>3.8</b> | <b>38.0</b> | <b>4.2</b> | <b>43.0</b> | <b>59.3</b> | <b>50.3</b> | <b>46.0</b> | <b>46.7</b> | <b>42.0</b> | <b>25.7</b> | <b>24.0</b> | <b>10.0</b> |
|              |                                      |             | SD                     | 3.2         | 1.0         | 0.3        | 2.6         | 1.4        | 2.6         | 0.8        | 2.6         | 3.1         | 3.8         | 2.6         | 2.3         | 1.0         | 2.3         | 2.6         | 0.0         |
|              |                                      |             | Min                    | 85.0        | 10.0        | 1.5        | 27.0        | 3.0        | 35.0        | 3.5        | 40.0        | 56.0        | 46.0        | 43.0        | 44.0        | 41.0        | 23.0        | 22.0        | 10.0        |
|              |                                      |             | Max                    | 91.0        | 12.0        | 2.0        | 32.0        | 5.5        | 40.0        | 5.0        | 45.0        | 62.0        | 53.0        | 48.0        | 48.0        | 43.0        | 27.0        | 27.0        | 10.0        |
|              |                                      |             | CV%                    | 3.6         | 9.1         | 15.7       | 8.8         | 37.7       | 7.0         | 18.3       | 6.2         | 5.1         | 7.5         | 5.8         | 4.9         | 2.4         | 9.0         | 11.0        | 0.0         |
| <b>i</b>     | <i>S. austriaca</i>                  | <b>2</b>    | Ar. mean               | <b>84.5</b> | <b>11.0</b> | <b>2.5</b> | <b>34.5</b> | <b>4.5</b> | <b>42.0</b> | <b>4.0</b> | <b>44.0</b> | <b>59.0</b> | <b>45.5</b> | <b>46.5</b> | <b>40.5</b> | <b>36.5</b> | <b>28.5</b> | <b>28.0</b> | <b>9.0</b>  |
|              |                                      |             | SD                     | 0.7         | 1.4         | 0.7        | 3.5         | 0.7        | 1.4         | 0.0        | 0.0         | 1.4         | 2.1         | 2.1         | 0.7         | 0.7         | 2.1         | 1.4         | 0.0         |
|              |                                      |             | Min                    | 84.0        | 10.0        | 2.0        | 32.0        | 4.0        | 41.0        | 4.0        | 44.0        | 58.0        | 44.0        | 45.0        | 40.0        | 36.0        | 27.0        | 27.0        | 9.0         |
|              |                                      |             | Max                    | 85.0        | 12.0        | 3.0        | 37.0        | 5.0        | 43.0        | 4.0        | 44.0        | 60.0        | 47.0        | 48.0        | 41.0        | 37.0        | 30.0        | 29.0        | 9.0         |
|              |                                      |             | CV%                    | 0.8         | 12.9        | 28.3       | 10.2        | 15.7       | 3.4         | 0.0        | 0.0         | 2.4         | 4.7         | 4.6         | 1.7         | 1.9         | 7.4         | 5.1         | 0.0         |
| <b>j</b>     | <i>S. austriaca</i>                  | <b>6</b>    | Ar. mean               | <b>82.6</b> | <b>12.4</b> | <b>1.0</b> | <b>30.3</b> | <b>3.0</b> | <b>34.4</b> | <b>2.5</b> | <b>36.0</b> | <b>52.5</b> | <b>37.8</b> | <b>45.2</b> | <b>45.7</b> | <b>41.7</b> | <b>26.3</b> | <b>28.9</b> | <b>10.7</b> |
|              |                                      |             | SD                     | 10.7        | 1.9         | 0.6        | 7.1         | 1.7        | 7.2         | 1.2        | 5.3         | 6.5         | 4.9         | 3.4         | 2.3         | 1.9         | 2.0         | 2.2         | 1.6         |
|              |                                      |             | Min                    | 70.0        | 10.0        | 0.5        | 21.0        | 1.4        | 25.0        | 0.8        | 29.0        | 45.0        | 32.0        | 42.0        | 42.0        | 38.8        | 24.0        | 26.5        | 9.0         |
|              |                                      |             | Max                    | 97.0        | 15.0        | 1.9        | 38.0        | 5.0        | 42.0        | 3.5        | 42.0        | 62.0        | 45.0        | 50.0        | 48.0        | 44.0        | 29.0        | 32.0        | 13.0        |
|              |                                      |             | CV%                    | 13.0        | 15.3        | 55.5       | 23.5        | 57.0       | 20.8        | 49.9       | 14.8        | 12.4        | 13.0        | 7.5         | 4.9         | 4.5         | 7.5         | 7.6         | 15.3        |
| <b>k</b>     | <i>S. pekarovae</i>                  | <b>4</b>    | Ar. mean               | <b>89.5</b> | <b>11.5</b> | <b>3.9</b> | <b>38.0</b> | <b>7.5</b> | <b>47.8</b> | <b>7.8</b> | <b>50.0</b> | <b>80.3</b> | <b>44.8</b> | <b>61.3</b> | <b>55.5</b> | <b>50.0</b> | <b>39.8</b> | <b>33.5</b> | <b>10.5</b> |
|              |                                      |             | SD                     | 1.7         | 1.3         | 2.5        | 3.5         | 2.5        | 3.0         | 3.0        | 0.0         | 0.5         | 4.1         | 6.3         | 5.2         | 5.1         | 2.6         | 5.1         | 0.6         |
|              |                                      |             | Min                    | 87.0        | 10.0        | 1.0        | 35.0        | 4.0        | 44.0        | 5.0        | 50.0        | 80.0        | 40.0        | 55.0        | 51.0        | 45.0        | 36.0        | 29.0        | 10.0        |
|              |                                      |             | Max                    | 91.0        | 13.0        | 7.0        | 43.0        | 10.0       | 51.0        | 12.0       | 50.0        | 81.0        | 50.0        | 70.0        | 63.0        | 57.0        | 42.0        | 40.0        | 11.0        |
|              |                                      |             | CV%                    | 1.9         | 11.2        | 65.3       | 9.1         | 33.6       | 6.3         | 38.5       | 0.0         | 0.6         | 9.2         | 10.3        | 9.4         | 10.2        | 6.6         | 15.1        | 5.5         |
| <b>l</b>     | <i>S. aria</i> × <i>S. austriaca</i> | <b>3</b>    | Ar. mean               | <b>75.3</b> | <b>12.8</b> | <b>3.7</b> | <b>35.3</b> | <b>3.9</b> | <b>41.7</b> | <b>4.8</b> | <b>38.8</b> | <b>60.6</b> | <b>36.3</b> | <b>55.6</b> | <b>47.3</b> | <b>40.1</b> | <b>31.0</b> | <b>34.1</b> | <b>7.5</b>  |
|              |                                      |             | SD                     | 8.9         | 1.5         | 0.6        | 9.8         | 0.1        | 6.7         | 1.0        | 5.9         | 10.1        | 5.5         | 8.1         | 7.5         | 4.3         | 7.8         | 6.0         | 0.5         |
|              |                                      |             | Min                    | 65.0        | 11.0        | 3.0        | 24.0        | 3.8        | 34.0        | 4.2        | 32.0        | 50.0        | 30.0        | 50.8        | 42.8        | 37.2        | 22.0        | 30.2        | 7.2         |
|              |                                      |             | Max                    | 80.5        | 13.7        | 4.1        | 41.0        | 4.0        | 45.8        | 6.0        | 42.5        | 70.0        | 40.0        | 65.0        | 56.0        | 45.0        | 36.0        | 41.0        | 8.0         |
|              |                                      |             | CV%                    | 11.8        | 12.0        | 16.4       | 27.7        | 2.9        | 16.1        | 20.9       | 15.3        | 16.6        | 15.1        | 14.6        | 15.9        | 10.7        | 25.2        | 17.7        | 6.2         |
